# Supplementary material
Source: MDPI journal article supplement (https://www.mdpi.com/2079-6412/14/5/566)
Supplement: s1 [file s1]

# Supporting Information

**Table S1.** A comparison of the luminescent properties of these phosphors.

| Phosphor                                                                            | PL Wavelength (nm)      | Afterglow time (h) | Excitation source |
|-------------------------------------------------------------------------------------|-------------------------|--------------------|-------------------|
| Ba <sub>5</sub> Si <sub>8</sub> O <sub>21</sub> :Eu <sup>2+</sup> ,Dy <sup>3+</sup> | 473                     | 8                  | Sunlight          |
| CaAl <sub>2</sub> O <sub>4</sub> :Eu <sup>2+</sup> ,Nd <sup>3+</sup>                | 442                     | /                  | Sunlight          |
| SrAl <sub>2</sub> O <sub>4</sub> :Eu <sup>2+</sup> ,Dy <sup>3+</sup>                | 522                     | 8                  | Sunlight          |
| Ba <sub>2</sub> SiO <sub>4</sub> :Eu <sup>2+</sup> ,Ho <sup>3+</sup>                | 504                     | 24                 | UV                |
| BaSiO <sub>3</sub> :Eu <sup>2+</sup> ,Nd <sup>3+</sup> ,Tm <sup>3+</sup>            | 560                     | 10                 | Sunlight          |
| SrSc <sub>2</sub> O <sub>4</sub> :Pr <sup>3+</sup>                                  | 495, 545, 621, 630, 657 | 7.5                | UV                |
| BaZnGeO <sub>4</sub> :Bi <sup>3+</sup>                                              | 440, 595                | 3                  | UV                |
| LiGaO <sub>2</sub> :Mn <sup>2+</sup>                                                | 550, 650                | 48                 | blue light        |
| LiYGeO <sub>4</sub> :Eu <sup>3+</sup>                                               | 611                     | 21                 | UV                |
| MgGeO <sub>3</sub> :Mn <sup>2+</sup>                                                | 678                     | 6                  | UV                |

**Table S2.** The results of fitting data of water absorption of blue luminescent coatings with different filler CaCO<sub>3</sub> content.

| CaCO <sub>3</sub> | <i>a</i>  | <i>n</i>  |
|-------------------|-----------|-----------|
| 2%                | 0.51±0.09 | 0.49±0.02 |
| 2.5%              | 0.48±0.09 | 0.49±0.02 |
| 3%                | 0.46±0.09 | 0.49±0.02 |
| 3.5%              | 0.42±0.07 | 0.48±0.02 |
| 4%                | 0.46±0.09 | 0.49±0.02 |

**Table S3.** The blue channel values of afterglow decay images of luminescent coatings with different ratios of phosphor to emulsion (in RGB format).

| Time (h) | 1:3 | 1:2.5 | 1:2 | 1:1.5 | 1:1 |
|----------|-----|-------|-----|-------|-----|
| 0        | 184 | 215   | 217 | 241   | 225 |
| 1        | 127 | 160   | 176 | 202   | 188 |
| 2        | 38  | 50    | 55  | 87    | 66  |
| 3        | 28  | 39    | 47  | 70    | 50  |
| 4        | 17  | 30    | 40  | 59    | 48  |
| 5        | 15  | 28    | 34  | 38    | 35  |

**Table S4.** The blue channel values of afterglow decay images of luminescent coatings with different SiO<sub>2</sub> content (in RGB format).

| Time (h) | 0.5% | 0.75% | 1%  | 1.25% | 1.5% |
|----------|------|-------|-----|-------|------|
| 0        | 221  | 226   | 230 | 249   | 235  |
| 1        | 144  | 160   | 188 | 215   | 197  |
| 2        | 57   | 70    | 84  | 109   | 95   |
| 3        | 40   | 62    | 69  | 76    | 70   |
| 4        | 33   | 49    | 55  | 68    | 61   |
| 5        | 21   | 30    | 39  | 51    | 41   |

**Table S5.** The blue channel values of afterglow decay images of luminescent coatings with different CaCO<sub>3</sub> contents (in RGB format).

| Time (h) | 2%  | 2.5% | 3%  | 3.5% | 4%  |
|----------|-----|------|-----|------|-----|
| 0        | 224 | 228  | 236 | 251  | 230 |
| 1        | 158 | 175  | 194 | 221  | 177 |
| 2        | 88  | 94   | 108 | 124  | 101 |
| 3        | 64  | 77   | 80  | 104  | 78  |
| 4        | 49  | 59   | 61  | 75   | 59  |
| 5        | 33  | 36   | 44  | 54   | 42  |

**Table S6.** The blue channel values of afterglow decay images of luminescent coatings (in RGB format).

|        | 0 h | 1h  | 2 h | 3 h | 4 h | 5 h |
|--------|-----|-----|-----|-----|-----|-----|
| Sunday | 254 | 230 | 192 | 99  | 82  | 48  |
| Cloudy | 250 | 224 | 183 | 94  | 71  | 43  |
| Rainy  | 231 | 219 | 175 | 89  | 69  | 41  |

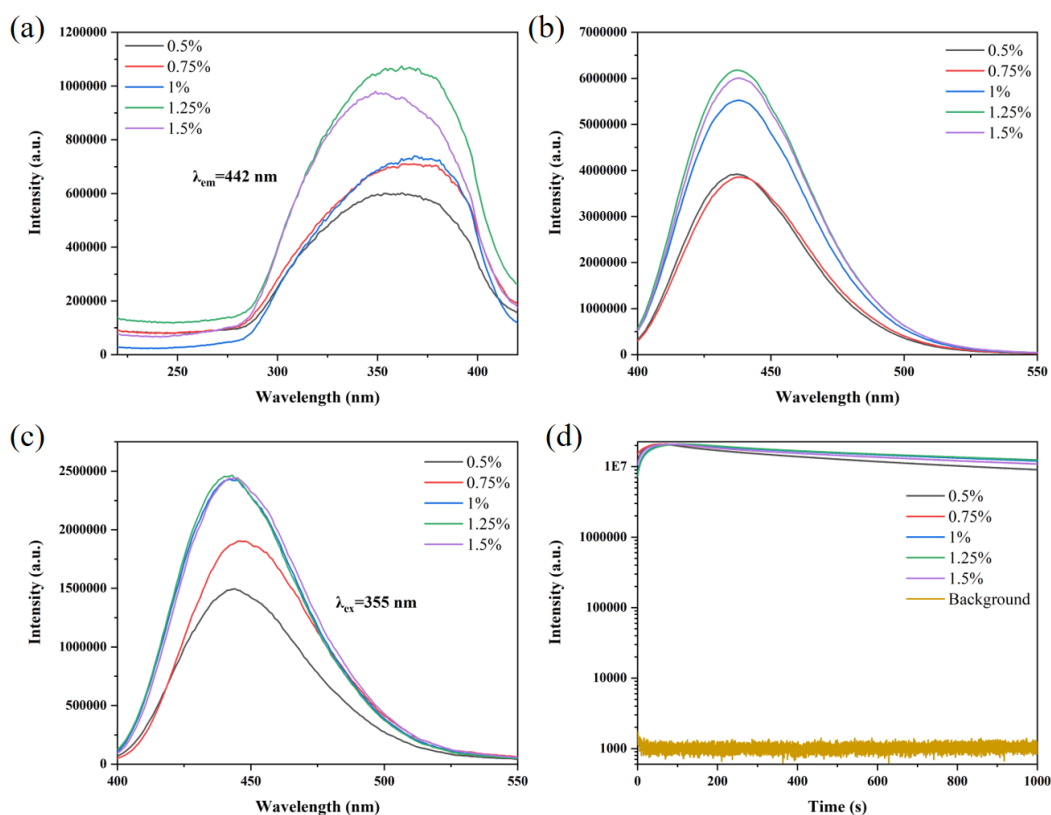

**Figure S1.** (a) PLE spectra, and (b) PL spectra of luminescent coatings with different SiO<sub>2</sub> contents. (c) Afterglow spectra, and (d) Afterglow decay curves of luminescent coatings with different SiO<sub>2</sub> contents obtained after 5 min illumination with 365 nm UV light.

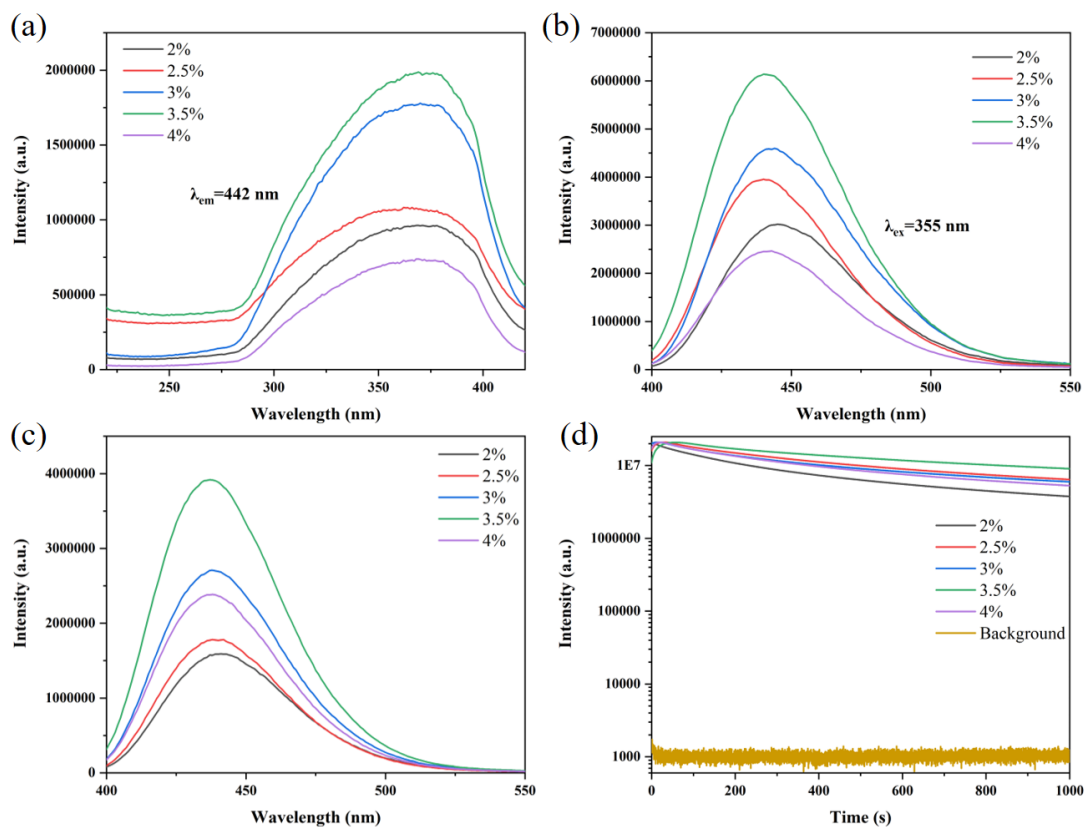

**Figure S2.** (a) PLE spectra, and (b) PL spectra of luminescent coatings with different  $\text{CaCO}_3$  contents. (c) Afterglow spectra, and (d) Afterglow decay curves of luminescent coatings with different  $\text{CaCO}_3$  contents obtained after 5 min illumination with 365 nm UV light.

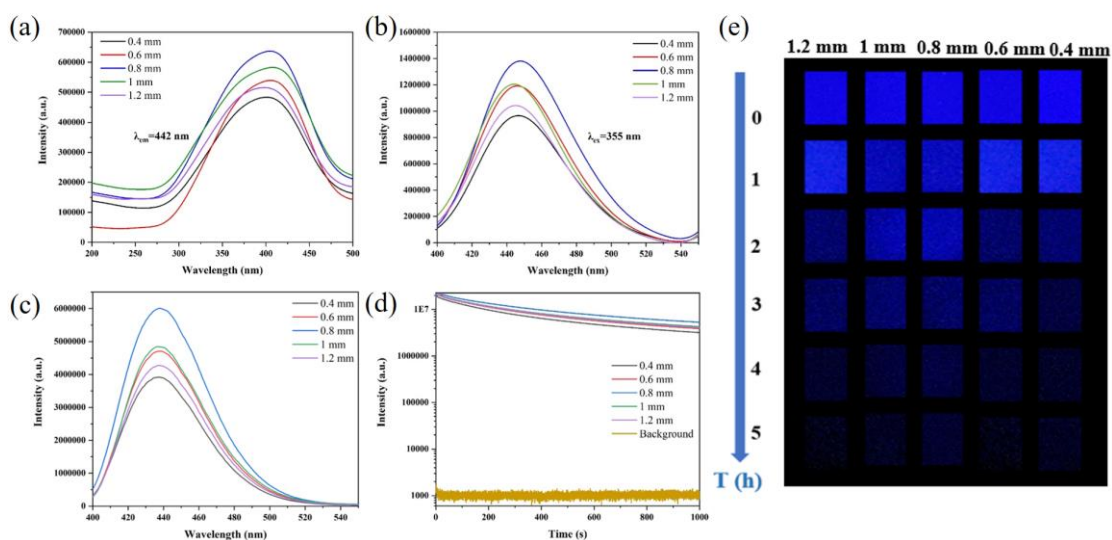

**Figure S3.** (a) PLE spectra, and (b) PL spectra of luminescent coatings with different thickness. (c) Afterglow spectra, and (d) Afterglow decay curves of luminescent coatings with different thickness obtained after 5 min illumination with 365 nm UV light. (e) Afterglow images of luminescent coatings taken after sunlight excitation for 2 h, with different thickness.
